# Supplementary material
Source: PubMed Central journal article supplement (PMC6708276)

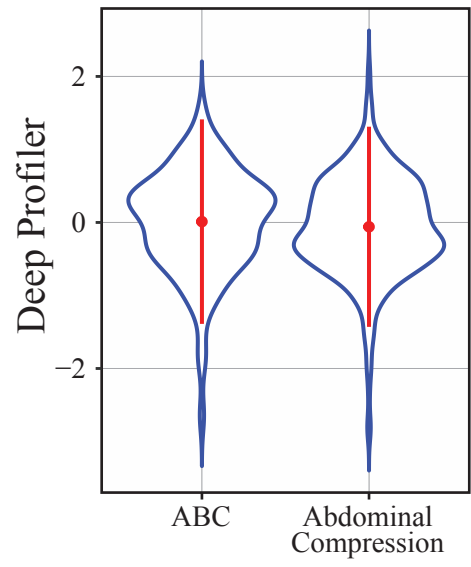

Supplementary Figure 1.

Supplement: NIHMS1045994-supplement-Supplementary_Figure_1.pdf [file NIHMS1045994-supplement-Supplementary_Figure_1.pdf]

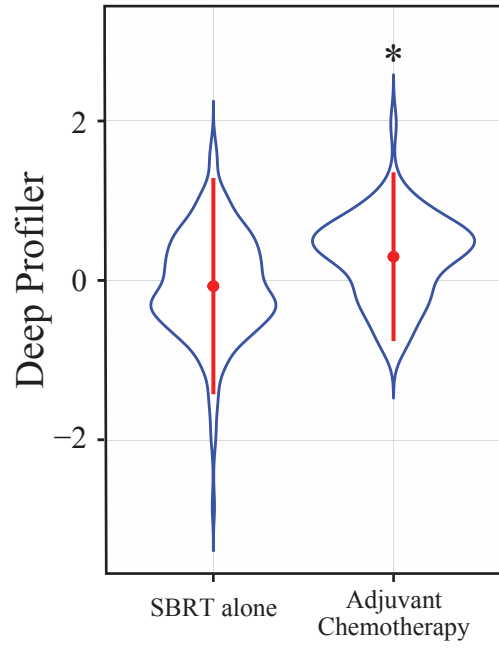

Supplementary Figure 2.

Supplement: NIHMS1045994-supplement-Supplementary_Figure_2.pdf [file NIHMS1045994-supplement-Supplementary_Figure_2.pdf]

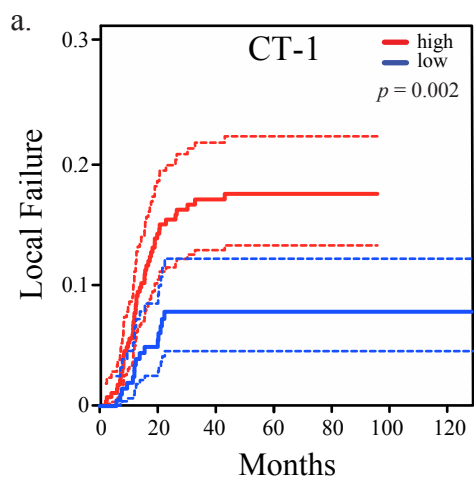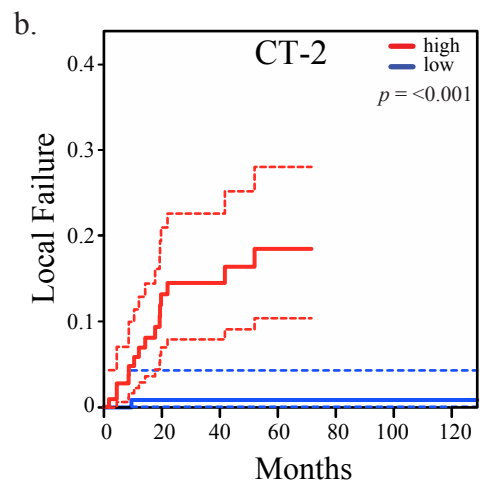

Supplemental Figure 3.

Supplement: NIHMS1045994-supplement-Supplementary_Figure_3.pdf [file NIHMS1045994-supplement-Supplementary_Figure_3.pdf]
